# Supplementary material for: Analyzing the Spatiotemporal Dynamics and Driving Forces of Ecological Environment Quality in the Qinling Mountains, China
Source: MDPI journal article supplement (doi:10.3390/su16083251), 2024-04-13
Supplement: s1 [file s1]

# Supplementary Materials:

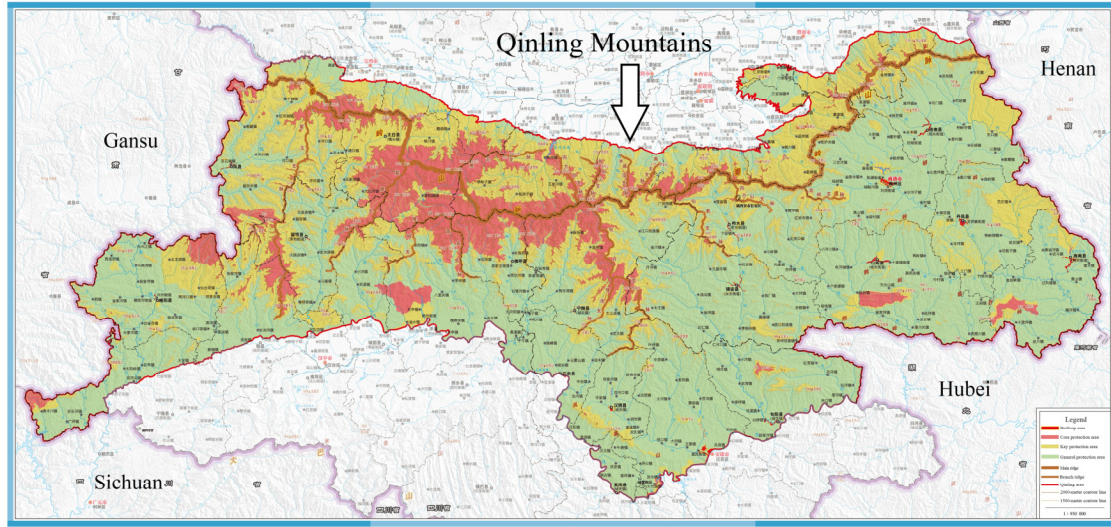

**Figure S1:** Ecological protection areas in the Qinling region (downloaded and briefly translated from the government website ([http://www.shaanxi.gov.cn/zfxgk/zfgb/2020/d17q/202009/t20200921\\_1728563.html](http://www.shaanxi.gov.cn/zfxgk/zfgb/2020/d17q/202009/t20200921_1728563.html))).

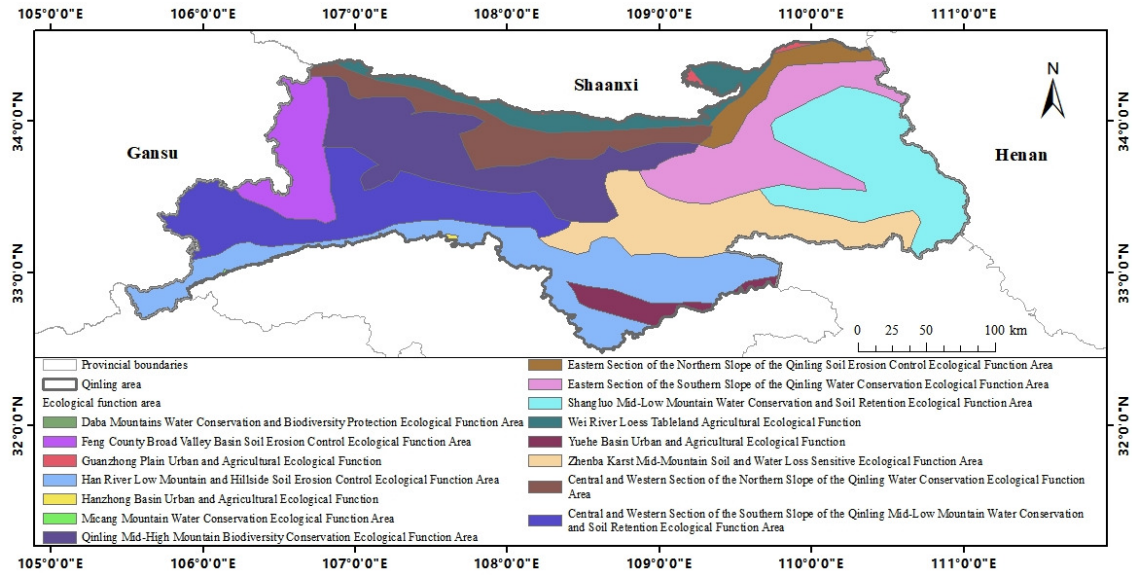

**Figure S2:** Ecological function area in the Qinling region

**Table S1:** Validation of RSEI results based on field ecological environment surveys

| Number | Validation point location  | RSEI grades | Surveyed land use type | Surveyed vegetation cover | Surveyed quality levels |
|--------|----------------------------|-------------|------------------------|---------------------------|-------------------------|
| 1      | 110°21'27.6"E 34°28'31.0"N | good        | cropland               | 95%                       | good                    |
| 2      | 110°21'6.2"E 34°28'32.7"N  | good        | cropland               | 60%                       | good                    |

---

|    |                            |          |          |     |          |
|----|----------------------------|----------|----------|-----|----------|
| 3  | 110°20'41.6"E 34°28'26.9"N | good     | cropland | 70% | fair     |
| 4  | 110°20'7.2"E 34°28'13.62"N | good     | forest   | 95% | good     |
| 5  | 110°18'36.9"E 34°27'45.9"N | moderate | cropland | 70% | moderate |
| 6  | 110°16'53.5"E 34°28'28.0"N | moderate | forest   | 50% | moderate |
| 7  | 110°15'3.4"E 34°28'47.1"N  | moderate | forest   | 85% | moderate |
| 8  | 110°14'31.6"E 34°29'5.0"N  | moderate | cropland | 60% | moderate |
| 9  | 110°13'36.9"E 34°29'18.1"N | moderate | forest   | 98% | good     |
| 10 | 110°13'20.4"E 34°29'25.1"N | moderate | forest   | 50% | moderate |
| 11 | 110°13'3.1"E 34°29'42.6"N  | moderate | forest   | 40% | moderate |
| 12 | 107°33'19.5"E 34°4'8.7"N   | good     | forest   | 98% | good     |

---
